# Supplementary material
Source: PubMed Central journal article supplement (PMC3057850)
Supplement: supp_M110.167247_jbc.M110.167247-1.pdf [file supp_M110.167247_jbc.M110.167247-1.pdf]

## Supplemental Data

### INTRAPHAGOSOMAL PEROXYNITRITE AS A MACROPHAGE-DERIVED CYTOTOXIN AGAINST INTERNALIZED *TRYPANOSOMA CRUZI*

Consequences for oxidative killing and role of microbial peroxiredoxins in infectivity

By María Noel Alvarez, Gonzalo Peluffo, Lucía Piacenza and Rafael Radi

#### SD\_Fig 1. Western blot analysis of myeloperoxidase in J774A-1 macrophages

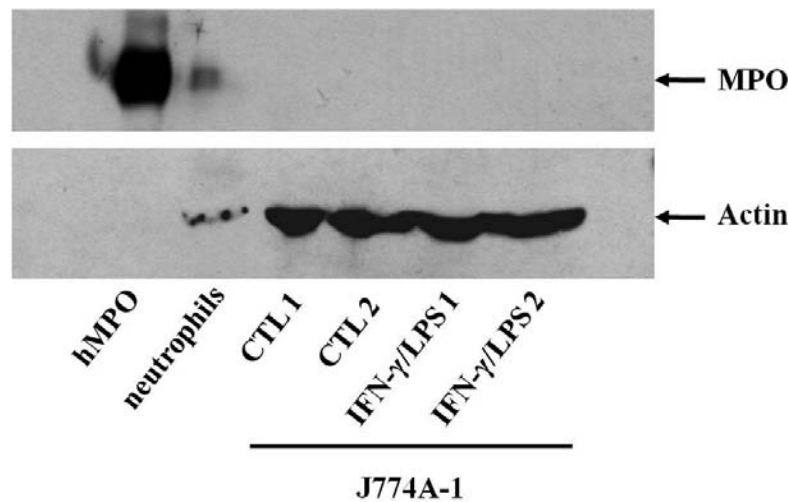

In order to explore the presence of minimal amounts of MPO in J774A-1 macrophages, a western blot analysis of cells lysates was performed. An anti human-MPO antibody known to react also with murine MPO was used. As a positive control, recombinant human MPO and an extract from mice neutrophils were used. The presence of MPO in J774A-1 macrophages was explored in unstimulated (CTL) and INF- $\gamma$ /LPS- activated cells. An anti-actin antibody was used for load control of total proteins and for comparative purposes. Protein load was 15  $\mu$ g for neutrophils and 60 or 80  $\mu$ g for macrophages in (1) and (2), respectively.

No signal for macrophage MPO protein was detected even though protein load compared to mice neutrophils was notably higher as indicated by the actin signal.

**SD\_Fig 2 . Immunocytochemical evaluation of protein tyrosine nitration in macrophages**

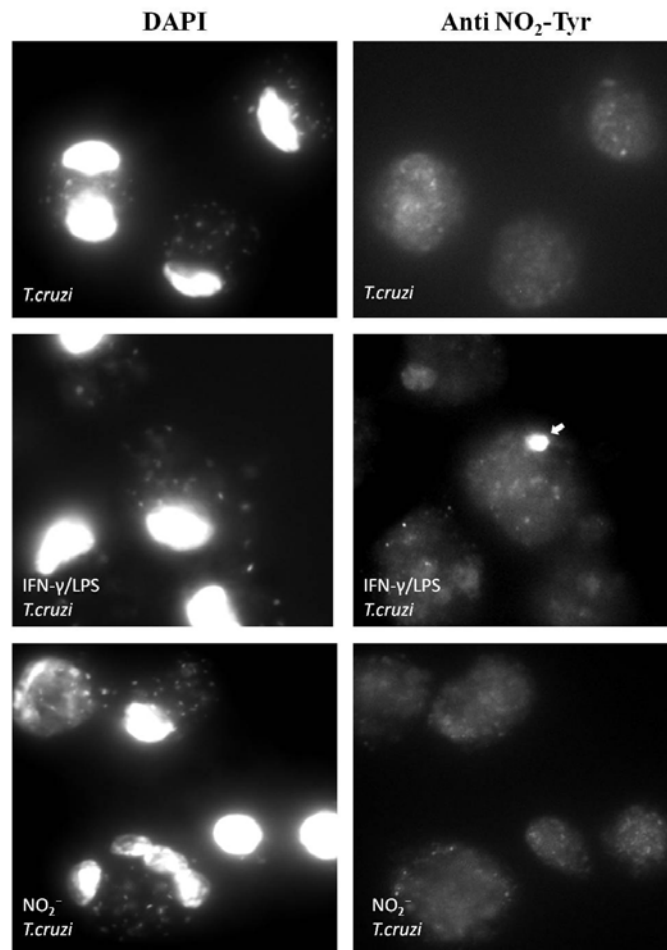

To further evaluate a heme peroxidase-dependent protein tyrosine nitration mechanism (including MPO) which depends on the presence of  $\text{H}_2\text{O}_2$  and  $\text{NO}_2^-$  as substrates, macrophages were challenged with *T.cruzi* in the presence of  $10\ \mu\text{M}\ \text{NO}_2^-$ ; this amount of  $\text{NO}_2^-$  doubles the expected formation from the decay of  $^*\text{NO}$  in activated macrophages and  $\text{H}_2\text{O}_2$  is provided by the respiratory burst upon *T. cruzi* internalization. Unstimulated macrophages in the absence (*T.cruzi*) and presence of  $10\ \mu\text{M}$  nitrite ( $\text{NO}_2^- + T.cruzi$ ) and activated (*T.cruzi* + IFN- $\gamma$ /LPS) macrophages were infected with trypomastigotes (20:1). Following phagocytosis (2 h), macrophages were incubated with anti-3-nitrotyrosine antibody and visualized with Alexa-488-conjugated anti-rabbit antibody (right column) and nuclei were stained with DAPI (Left column) (magnification,  $\times 1000$ ).

Arrow shows an internalized nitrated *T.cruzi* in stimulated macrophages. No parasite protein tyrosine nitration was observed in unstimulated macrophages in the presence of  $\text{NO}_2^-$ , ruling out a peroxidatic mechanism.
